# Supplementary material
Source: PubMed Central journal article supplement (PMC6462509)
Supplement: supp_RA118.006069_141076_2_supp_285468_pmvgwg.pdf [file supp_RA118.006069_141076_2_supp_285468_pmvgwg.pdf]

## Supplemental information

### Table S1

Lethality analysis of *Atg101<sup>6h</sup>* mutant. All genetic crosses were performed as indicated. The number of progenies for each cross was counted. The percentage of *Atg101<sup>6h</sup>* mutant females and males was reduced as compared to the controls (highlight in blue and red color). The reduction for *Atg101<sup>6h</sup>* mutant males was restored when expressing *UAS-Atg101* by *Da-Gal4*.

### Figure S1 Characterization of *Atg101* mutant allele

- (A) Relative S6KL expression levels in both wild type and *Atg101<sup>6h</sup>* mutants. qPCR analysis for S6KL mRNA expression levels were carried out in both wild-type and *Atg101<sup>6h</sup>* mutants. Data were normalized to rp49.
- (B) Representative confocal images of *Drosophila* larval NMJ4 of wild type and *Atg101<sup>6h</sup>* mutants labeled with anti-CSP. Scale Bar: 10 um.
- (C) Quantification of synaptic bouton numbers in wild type and *Atg101<sup>6h</sup>* mutants. n=8.
- (D) Decreased hatching rate (200 embryos for each experiment, with three replicates), pupation rate (50 larvae for each experiment, with five replicates) and eclosion rate (at least 40 pupae for each experiment, with five replicates) in *Atg101<sup>6h</sup>* mutants. Data are presented as mean±SD. Paired t-test was used for statistical analysis. \*\* indicates that p<0.01. \* indicates that p<0.05.
- (E) Lethality of *Atg101* mutants during pupal stage.
- (F) Lethality of *Atg101* mutants during eclosion.
- (G) A wild type male fly with normal wing posture.
- (H) Wing posture defects of *Atg101<sup>6h</sup>* mutants.
- (I) A rescue male fly with normal wing posture.
- (J) Delayed pupation in *Atg101<sup>6h</sup>* mutants. Pupation rates of wild-type and *Atg101<sup>6h</sup>* mutant animals at the indicated days after larval hatching.
- (K) Delayed adult eclosion in *Atg101<sup>6h</sup>* mutants. Eclosion rates of wild-type and *Atg101<sup>6h</sup>* mutant animals at the indicated days after larval hatching.

(L) RT-PCR reveals the expression of *Atg101* mRNA at different developmental stages. E1, 0-12 hour embryo; E2, 12-24 hour embryo; L1, first instar larvae; L2, second instar larvae; L3, third instar larvae; P, pupae; A, adults. *rp49* serves as a control.

(M) RT-PCR reveals the expression of *Atg101*, *Atg1*, *Atg3*, *Atg4a*, *Atg7* and *Atg8a* in 0-12 hour embryo. *rp49* serves as a control.

### **Figure S2 *Atg101* mutant midguts display delayed cell death**

(A) Morphology of midguts at +4 hour RPF for both wild-type and *Atg101*<sup>6h</sup> mutants. Less contracted gastric caeca (arrows) was seen in *Atg101*<sup>6h</sup> mutants. Scale Bar: 100  $\mu$ m. (B) Quantification of gastric caeca size in the control (n=14) and *Atg101* mutants (n=8). Data are presented as mean $\pm$ SD. \*\*\* indicates that  $p < 0.001$ .

### **Figure S3 *Partial colocalization between ubiquitinated proteins and Ref(2)p aggregates in Atg101 mutant brains***

(A-A'') Shown are confocal images of adult brain of a 7 day-old *Atg101*<sup>6h</sup> mutant fly. Ref(2)p protein aggregates partially colocalize with ubiquitin. (B-B'') Higher magnification images of the area surrounded by the white square in A''. Scale bar: 10  $\mu$ m.

### **Figure S4 *Loss of Atg101 results in the enlarged abdomen***

- (A) An image of a wild-type male abdomen.
- (B) An image of an *Atg101*<sup>6h</sup> mutant male abdomen.
- (C) An image of a rescue male abdomen.

Figure S1

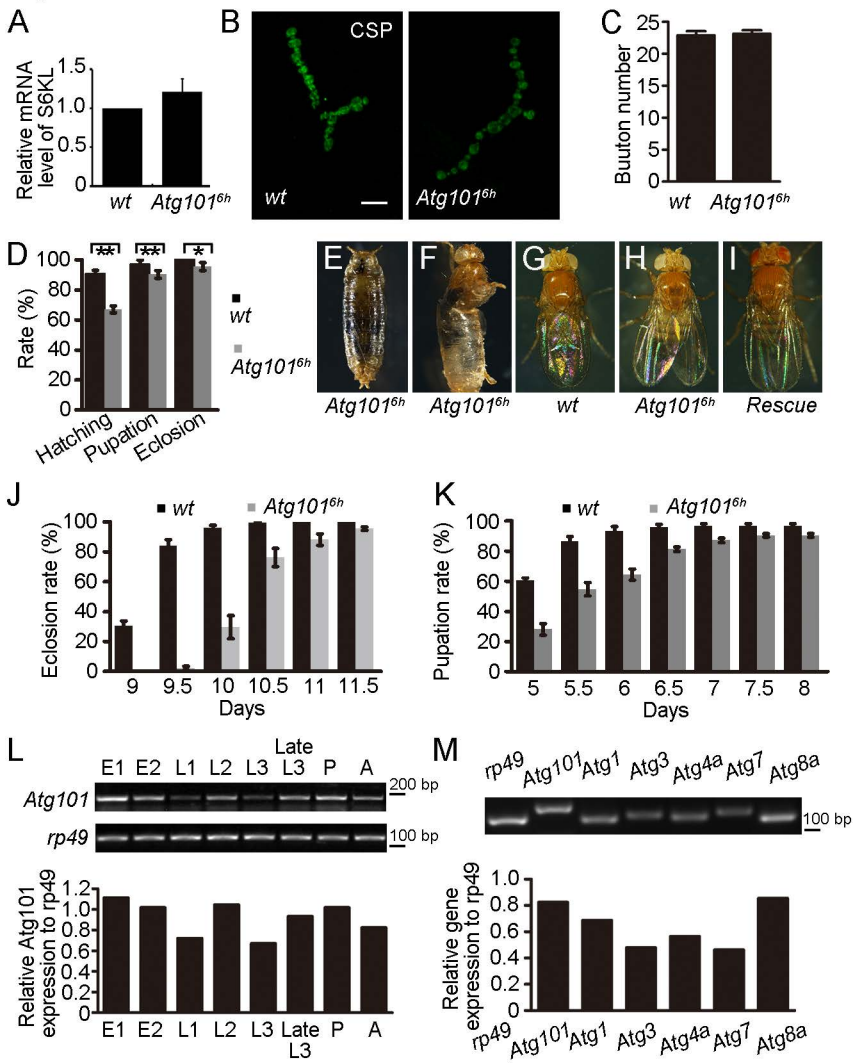

# Figure S2

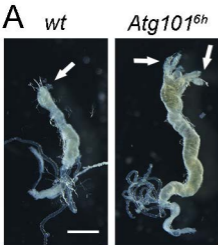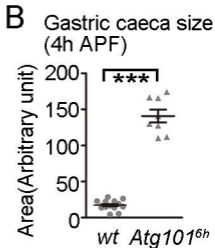

Figure S3

ubiquitin

Ref(2)p

ubiquitin+Ref(2)p  
+DAPI

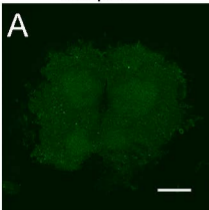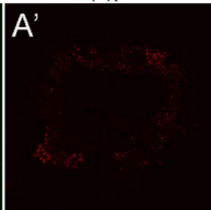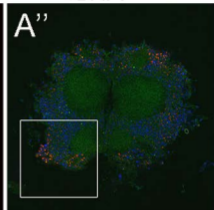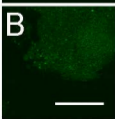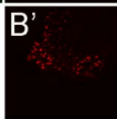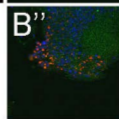

# Figure S4

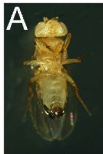

*wt*

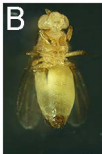

*Atg101<sup>6h</sup>*

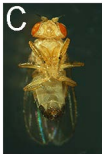

*Rescue*

**Table S1**

| Cross                                                                             | Female                                                                           |                                             | Male                                                                                  |                                            |
|-----------------------------------------------------------------------------------|----------------------------------------------------------------------------------|---------------------------------------------|---------------------------------------------------------------------------------------|--------------------------------------------|
| <i>FM6/+</i> x <i>+/Y</i>                                                         | <i>+/+</i><br>96 <b>(54% of all females)</b>                                     | <i>FM6/+</i><br>83                          | <i>+/Y</i><br>70 <b>(74% of all males)</b>                                            | <i>FM6/Y</i><br>24                         |
| <i>Atg101<sup>6h</sup>/FM6</i> x <i>FM6/Y</i>                                     | <i>Atg101<sup>6h</sup>/FM6</i><br>147                                            | <i>FM6/FM6</i><br>17                        | <i>Atg101<sup>6h</sup>/Y</i><br>13 <b>(36% of all males)</b>                          | <i>FM6/Y</i><br>23                         |
| <i>Atg101<sup>6h</sup>/FM6</i> x<br><i>Atg101<sup>6h</sup>/Y</i>                  | <i>Atg101<sup>6h</sup>/Atg101<sup>6h</sup></i><br>31 <b>(21% of all females)</b> | <i>Atg101<sup>6h</sup>/FM6</i><br>118       | <i>Atg101<sup>6h</sup>/Y</i><br>34                                                    | <i>FM6/Y</i><br>46                         |
| <i>Atg101<sup>6h</sup>/FM6 ;UAS-Atg101/UAS-Atg101</i> x<br><i>Da-GAL4/Da-GAL4</i> | <i>Atg101<sup>6h</sup>/+ ;UAS-Atg101/+;Da-GAL4/+</i><br>122                      | <i>FM6/+ ;UAS-Atg101/+;Da-GAL4/+</i><br>104 | <i>Atg101<sup>6h</sup>/Y ;UAS-Atg101/+;Da-GAL4/+</i><br>113 <b>(80% of all males)</b> | <i>FM6/Y ;UAS-Atg101/+;Da-GAL4/+</i><br>28 |
